# Supplementary material for: Otopetrin 1 Protects Mice From Obesity-Associated Metabolic Dysfunction Through Attenuating Adipose Tissue Inflammation
Source: PubMed Central journal article supplement — Diabetes. 2014 Mar 13;63(4):1340–52. doi: 10.2337/db13-1139 (PMC3964504; doi:10.2337/db13-1139), 2014-03-13
Supplement: supp_db13-1139_DB131139SupplementaryData.pdf [file supp_db13-1139_DB131139SupplementaryData.pdf]

SUPPLEMENTARY DATA

**Supplementary Table 1.** List of qPCR primers.

| Gene name     | Forward                  | Reverse                 |
|---------------|--------------------------|-------------------------|
| Otop1         | GACAACCCGATGCTGGACT      | GCCAAAGACAATTCCTCCA     |
| UCP1          | GGCATTGAGAGGCAAATCAGCT   | CAATGAACACTGCCACACCTC   |
| Dio2          | GATGCTCCCAATTCCAGTGT     | TGAACCAAGTTGACCACCA     |
| Prdm16        | CGGAAGAGCGTGAGTACAATG    | TCCGTGAACACCTTGACACAGT  |
| PGC1 $\alpha$ | AGCCGTGACCACTGACAACGAG   | GCTGCATGGTTCTGAGTGCTAAG |
| Ndufb8        | GGCACGTGTTCCCTTCTAC      | CCGCTCCAGGTACAGATTATTGT |
| COX7B         | CGCAGTCCATCTTCGTCTC      | GCATTCCCATATTTGTCATG    |
| CD36          | TTAGATGTGGAACCCATAACTGGA | TTGACCAATATGTTGACCTGCAG |
| AcadL         | TGCACACATACAGACGGTGCAG   | TCAGATGCCCAGTATTTTGCC   |
| Acadm         | GCTGGAGACATTGCCAATCA     | GGCGTCCCTCATCAGCTTCT    |
| Leptin        | AGCAGTGCCTATCCAGAA       | TGCAGAGTCTGGTCCATCT     |
| iNos          | GAGGCCAGGAGGAGAGATCCG    | TCCATGCAGACAACCTTGGTGTG |
| IL6           | AGTTGCCTTCTTGGGACTGA     | TCCACGATTTCCAGAGAAC     |
| CCL5          | TGCCACGTCAAGGAGTATTT     | TTCTCTGGGTTGGCACACACT   |
| IFih1         | TCCTGGATGTTCTGCGCAA      | GACGAGTTAGCCAAGTCTGTGT  |
| FSP27         | TCGACCTGTACAAGCTGAACCT   | AGGTGCCAAGCAGCATGTGACC  |
| Plin4         | GCTCCACCTCCACAAGGAC      | GATGCCAAACACCCAGAG      |
| Ehhadh        | CAGATGAAGCACTCAAGCTTG    | ACCTTGCCAATGGCTTCTGCA   |
| Acox1         | GCCTGCTGTGGGTATGTCATT    | GTCATGGGCGGGTGCAT       |
| HMGCS2        | GACATCAACTCCCTGTGCCTG    | GATGTCAGTGTTGCCTGAATC   |
| CPT1 $\alpha$ | GAGAAATACCCTGACTATGTG    | TGTGAGTCTGTCTCAGGGCTAG  |
| FGF21         | CTGGGGTCTACCAAGCATA      | CACCCAGGATTTGAATGACC    |
| PPAR $\gamma$ | CCGTAGAAGCCGTGCAAGAG     | GGAGGCCAGCATCGTGTAGA    |
| SREBP1c       | ATCGGCGCGGAAGCTGTCGG     | GGAAGTCACTGTCTTGGTTG    |
| HSL           | GAGACACCAGCCAACGGATAC    | TTTTGCGGTTAGAAGCCACAT   |
| ATGL          | TGGGCCAGCAGATATGTTTG     | GAATCCGGACCTGGTGCAT     |
| GyK           | GTCAGCAACCAGAGGGAAC      | TGTCAAGGAGCCAACGAAG     |
| FASN          | GGTTACTGTGCTAGGTGTTG     | TCCAGGCGCATGAGGCTCAGC   |
| Arg1          | ACACGGCAGTGGCTTTAACC     | TGGCGCATTACAGTCACTT     |
| OASL1         | TGTGGCAGAAGGCTACAGATG    | ATATCGGGTGTCTCTTCACC    |
| OASL2         | TGCCTGGGAGAGAATCGAGA     | AGCCTCCCTTACCACCTTA     |
| IFi44         | AGCCCTATGGAGACCTGGTT     | AGCTAGACTTCCCAGCTCCA    |
| IFITM3        | CTGAGAAACCGAACTGCCG      | AGTGTGGTTCATGGTGGGA     |
| IRF1          | GCCATTACACAGGCCGATA      | CGATGTCTGGCAGGAGTTC     |
| CCL2          | AGGTCCCTGTGCTGCTTCTG     | TCTGGACCCATTCTTCTTG     |
| TNF $\alpha$  | AGCCCCAGTCTGTATCCTT      | CTCCCTTTGCAGAACTCAGG    |
| IFN $\gamma$  | GCTGATCCTTTGGACCCTCT     | GCAAAGCCAAGATGCAGTGT    |
| F4/80         | ATCCTTGGCCATCCGGCAGA     | GCAAAGCCAGGGTGGCAAGT    |
| Mac2          | CAGAGGACTACCCAGGAAAT     | TGAGGGTTTGGGTTCCAGAG    |
| CD68          | CTTGTGTTGACTCCAAGCC      | AACAGATATGCCCAAGCCC     |
